# Supplementary material for: Climatic variability in Princess Elizabeth Land (East Antarctica) over the last 350 years
Source: Copernicus journal article supplement (doi:10.5194/cp-13-61-2017), 2017-01-16
Supplement: Supplementary file 1 [file cp-13-61-2017-supplement.zip]

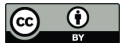

## *Supplement of*

# **Climatic variability in Princess Elizabeth Land (East Antarctica) over the last 350 years**

Alexey A. Ekaykin et al.

*Correspondence to:* Alexey A. Ekaykin (ekaykin@aari.ru)

- cp-13-61-2017-supplement-title-page.pdf
- PEL data.xls
- S1 cluster analysis.jpg
- S2.emf
- S3.ppt
- Supplementary materials for PEL paper.doc

The copyright of individual parts of the supplement might differ from the CC-BY 3.0 licence.
